# Supplementary figures and images for: Effects of iNOS in Hepatic Warm Ischaemia and Reperfusion Models in Mice and Rats: A Systematic Review and Meta-Analysis
Source: MDPI journal article supplement (doi:10.3390/ijms231911916), 2022-10-07

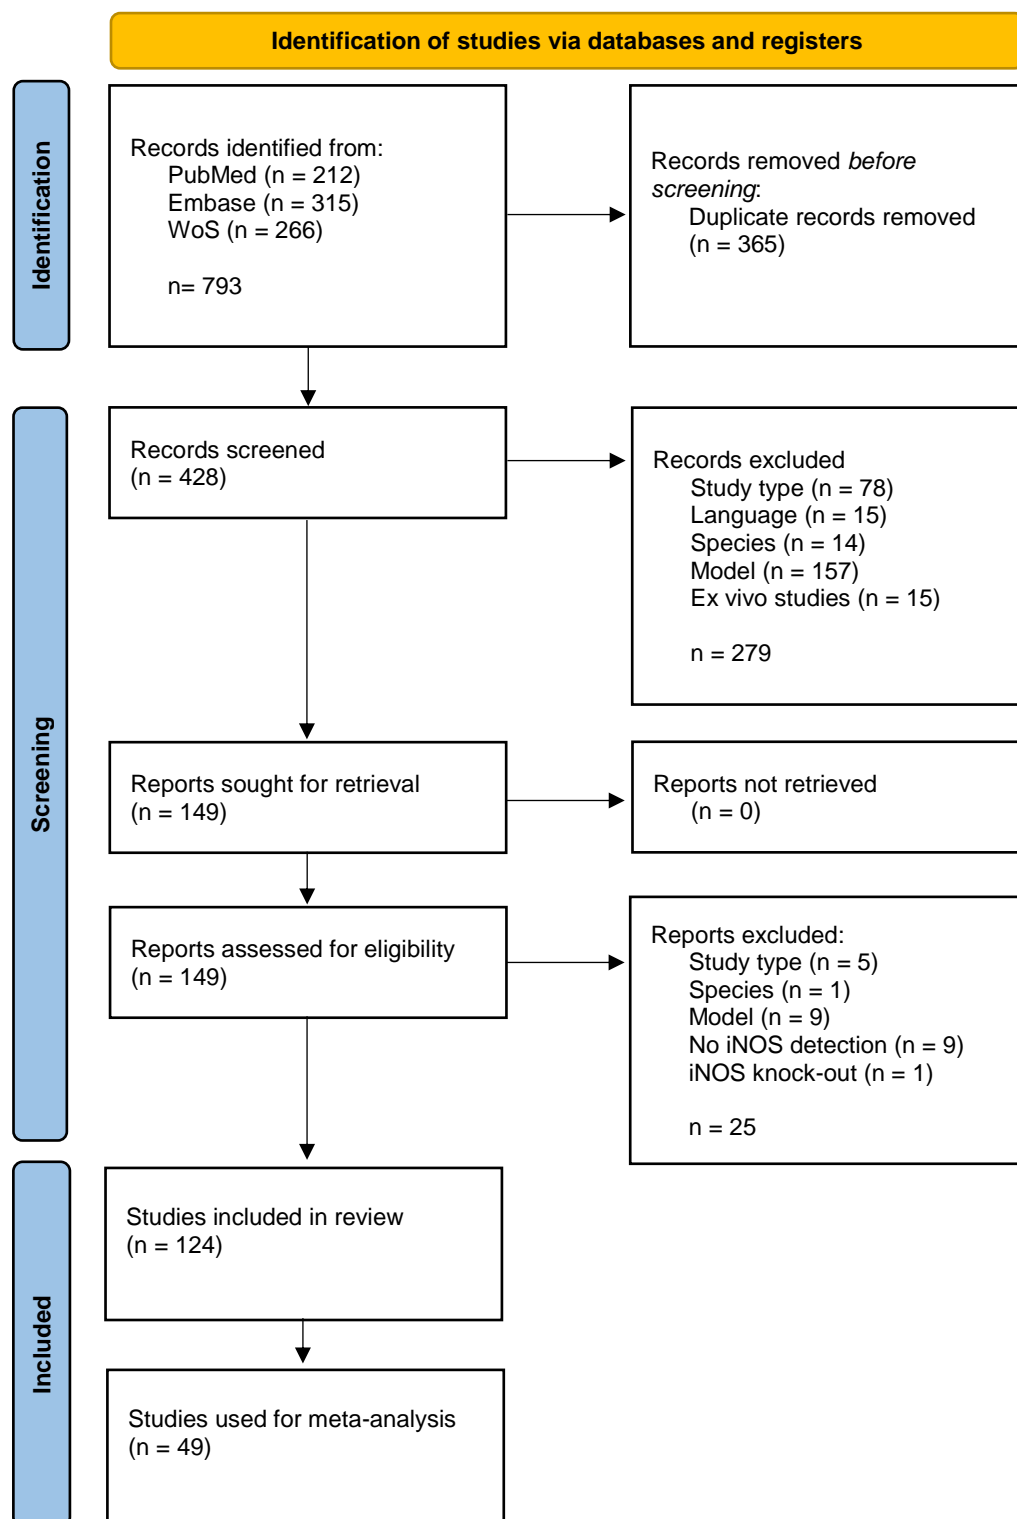

Supplement: s1 [file s1]
